# Supplementary material
Source: PubMed Central journal article supplement (PMC3561912)
Supplement: supp_dds496_dds496supp_table1.pdf [file supp_dds496_dds496supp_table1.pdf]

**Supplementary Table S1.** TCGA data on 188 glioblastomas, including patient information (barcode ID, gender, Karn score) and tumor characterization (subtype, miRNA expression values, MGMT methylation status, % necrosis).

| BCR Patient barcode | GBM subtype | log2 tumor/normal ratio |         |         | Gender | Karnofsky Performance Status | Secondary or Recurrent | MGMT methylation status | % Tumor Nuclei | % Necrosis |
|---------------------|-------------|-------------------------|---------|---------|--------|------------------------------|------------------------|-------------------------|----------------|------------|
|                     |             | miR-21                  | miR-221 | miR-128 |        |                              |                        |                         |                |            |
| TCGA-02-0001        | Classical   | 4.48                    | UC      | -1.811  | Female | 80                           | Rec                    | Unmethylated            | 97.5           | 0          |
| TCGA-02-0009        | Classical   | 4.376                   | UC      | -2.775  | Female | 90                           | No                     | Unmethylated            | 100            | 5          |
| TCGA-02-0015        | Classical   | 5.046                   | UC      | -2.981  | Male   | NA                           | No                     | Unmethylated            | 100            | 15         |
| TCGA-02-0016        | Classical   | 1.43                    | UC      | -1.558  | Male   | NA                           | No                     | Methylated              | 87.5           | 0          |
| TCGA-02-0021        | Classical   | 3.094                   | UC      | -2.868  | Female | 90                           | Rec                    | Unmethylated            | 100            | 7.5        |
| TCGA-02-0023        | Classical   | 4.625                   | UC      | -1.946  | Female | NA                           | No                     | Unmethylated            | 100            | 2.5        |
| TCGA-02-0027        | Classical   | 4.487                   | UC      | -2.881  | Female | 100                          | No                     | Unmethylated            | 100            | 12.5       |
| TCGA-02-0037        | Classical   | 4.625                   | UC      | -3.009  | Female | 90                           | No                     | Unmethylated            | 100            | 17.5       |
| TCGA-02-0038        | Classical   | 4.396                   | -1.746  | -2.645  | Female | 80                           | No                     | Unmethylated            | 100            | 12.5       |
| TCGA-02-0043        | Classical   | 4.625                   | UC      | -2.689  | Female | 90                           | Rec                    | Methylated              | 100            | 20         |
| TCGA-02-0068        | Classical   | 3.111                   | UC      | -2.919  | Male   | NA                           | No                     | NA                      | 97.5           | 12.5       |
| TCGA-02-0070        | Classical   | 4.194                   | UC      | -3.038  | Male   | NA                           | No                     | Unmethylated            | 100            | 2.5        |
| TCGA-02-0071        | Classical   | 4.281                   | UC      | -2.443  | Male   | NA                           | No                     | Unmethylated            | 100            | 10         |
| TCGA-02-0102        | Classical   | 3.7                     | UC      | -2.465  | Male   | 100                          | Sec                    | Unmethylated            | 97.5           | 15         |
| TCGA-02-0260        | Classical   | 2.96                    | -2.235  | -2.871  | Male   | NA                           | No                     | Unmethylated            | 85             | 20         |
| TCGA-02-0266        | Classical   | 4.432                   | UC      | -2.776  | Male   | NA                           | No                     | Unmethylated            | 100            | 22.5       |
| TCGA-02-0269        | Classical   | 2.252                   | -1.243  | -2.767  | Male   | NA                           | No                     | Methylated              | 100            | 2.5        |
| TCGA-02-0271        | Classical   | 4.543                   | UC      | -3.066  | Male   | NA                           | No                     | Methylated              | 100            | 30         |
| TCGA-02-0285        | Classical   | 3.714                   | UC      | -2.492  | Female | NA                           | No                     | NA                      | 100            | 30         |
| TCGA-02-0289        | Classical   | 3.523                   | UC      | -2.731  | Male   | NA                           | No                     | Unmethylated            | 100            | 7.5        |
| TCGA-02-0290        | Classical   | 4.392                   | UC      | -2.886  | Male   | NA                           | No                     | Methylated              | 100            | 7.5        |
| TCGA-02-0317        | Classical   | 3.801                   | -1.52   | -3.338  | Male   | NA                           | No                     | Unmethylated            | 100            | 32.5       |
| TCGA-02-0333        | Classical   | 3.624                   | UC      | -2.387  | Female | NA                           | No                     | Methylated              | 100            | 32.5       |
| TCGA-02-0422        | Classical   | 4.449                   | UC      | -2.276  | Male   | NA                           | No                     | Methylated              | 100            | 25         |
| TCGA-02-0430        | Classical   | 3.866                   | -1.196  | -2.571  | Female | NA                           | No                     | Unmethylated            | 100            | 7.5        |
| TCGA-06-0125        | Classical   | 3.487                   | UC      | -2.491  | Female | 70                           | No                     | Unmethylated            | 100            | 5          |
| TCGA-06-0126        | Classical   | 3.122                   | UC      | -2.273  | Male   | 70                           | No                     | Unmethylated            | 100            | 0          |
| TCGA-06-0127        | Classical   | 2.42                    | UC      | -1.819  | Male   | 60                           | No                     | Unmethylated            | 97.5           | 7.5        |
| TCGA-06-0157        | Classical   | 2.738                   | -1.089  | -2.691  | Female | 50                           | No                     | Unmethylated            | 97.5           | 5          |
| TCGA-06-0158        | Classical   | 3.467                   | -1.68   | -2.405  | Male   | 80                           | No                     | Unmethylated            | 97.5           | 2.5        |
| TCGA-06-0187        | Classical   | 3.095                   | UC      | -2.329  | Male   | 70                           | No                     | Methylated              | 100            | 10         |
| TCGA-06-0394        | Classical   | 4.543                   | UC      | -2.889  | Male   | NA                           | No                     | Unmethylated            | 85             | 2.5        |

|              |             |       |        |        |        |     |     |              |      |      |
|--------------|-------------|-------|--------|--------|--------|-----|-----|--------------|------|------|
| TCGA-06-0402 | Classical   | 3.92  | UC     | -2.5   | Male   | NA  | No  | Methylated   | 92.5 | 10   |
| TCGA-08-0244 | Classical   | 4.003 | UC     | -1.954 | Male   | 90  | No  | Unmethylated | 90   | 1    |
| TCGA-08-0246 | Classical   | 4.032 | UC     | -2.642 | Female | 70  | No  | Unmethylated | 87.5 | 15   |
| TCGA-08-0354 | Classical   | 4.745 | UC     | -2.615 | Female | NA  | No  | Methylated   | 90   | 12.5 |
| TCGA-08-0355 | Classical   | 2.494 | UC     | -2.64  | Female | NA  | No  | NA           | 92.5 | 7.5  |
| TCGA-08-0356 | Classical   | 4.795 | UC     | -3.103 | Female | NA  | No  | Unmethylated | 87.5 | 32.5 |
| TCGA-08-0357 | Classical   | 3.706 | UC     | -2.351 | Male   | NA  | No  | Unmethylated | 95   | 7.5  |
| TCGA-08-0358 | Classical   | 3.9   | UC     | -2.979 | Male   | 90  | No  | Unmethylated | 95   | 7.5  |
| TCGA-08-0375 | Classical   | 4.059 | UC     | -2.969 | Female | NA  | No  | Unmethylated | 100  | 17.5 |
| TCGA-08-0511 | Classical   | 4.429 | UC     | -1.865 | Male   | NA  | No  | Methylated   | 95   | 10   |
| TCGA-08-0514 | Classical   | 3.888 | -1.044 | -2.999 | Female | NA  | No  | Methylated   | 100  | 15   |
| TCGA-08-0516 | Classical   | 2.642 | -1.843 | -2.344 | Male   | NA  | No  | Unmethylated | 100  | 2.5  |
| TCGA-08-0518 | Classical   | 2.703 | -1.507 | -3.001 | Female | NA  | No  | Unmethylated | 100  | 30   |
| TCGA-08-0521 | Classical   | 4.538 | UC     | -2.533 | Male   | NA  | No  | Unmethylated | 92.5 | 12.5 |
| TCGA-08-0525 | Classical   | 4.543 | UC     | -2.903 | Male   | 80  | Sec | Unmethylated | 90   | 12.5 |
| TCGA-08-0529 | Classical   | 4.23  | UC     | -2.439 | Female | NA  | No  | Unmethylated | 92.5 | 7.5  |
| TCGA-08-0531 | Classical   | 3.35  | UC     | -2.702 | Male   | NA  | No  | Unmethylated | 80   | 7.5  |
| TCGA-12-0615 | Classical   | 3.186 | -1.347 | -2.855 | Female | 70  | No  | Unmethylated | 100  | 25   |
| TCGA-02-0004 | Mesenchymal | 5.046 | UC     | -2.852 | Male   | NA  | No  | Unmethylated | 97.5 | 7.5  |
| TCGA-02-0006 | Mesenchymal | 4.526 | UC     | -2.72  | Female | 90  | No  | Unmethylated | 100  | 7.5  |
| TCGA-02-0025 | Mesenchymal | 5.046 | UC     | -3.496 | Male   | NA  | No  | Unmethylated | 100  | 20   |
| TCGA-02-0033 | Mesenchymal | 4.74  | UC     | -3.328 | Male   | 100 | No  | Unmethylated | 100  | 15   |
| TCGA-02-0034 | Mesenchymal | 4.74  | UC     | -3.066 | Male   | 80  | No  | Unmethylated | 100  | 15   |
| TCGA-02-0039 | Mesenchymal | 4.95  | -1.456 | -2.697 | Male   | NA  | No  | Unmethylated | 100  | 12.5 |
| TCGA-02-0051 | Mesenchymal | 5.046 | 1.337  | -3.326 | Male   | NA  | No  | Unmethylated | 100  | 20   |
| TCGA-02-0054 | Mesenchymal | 4.625 | UC     | -2.791 | Female | 90  | No  | Methylated   | 95   | 2.5  |
| TCGA-02-0055 | Mesenchymal | 4.74  | UC     | -2.578 | Female | 90  | No  | Unmethylated | 95   | 15   |
| TCGA-02-0059 | Mesenchymal | 5.046 | UC     | -2.883 | Male   | NA  | No  | Unmethylated | 100  | 22.5 |
| TCGA-02-0064 | Mesenchymal | 4.239 | UC     | -2.835 | Male   | 100 | No  | Methylated   | 100  | 2.5  |
| TCGA-02-0075 | Mesenchymal | 5.127 | UC     | -2.633 | Male   | NA  | No  | Unmethylated | 100  | 7.5  |
| TCGA-02-0079 | Mesenchymal | 4.427 | UC     | -2.306 | Male   | NA  | No  | Unmethylated | 92.5 | 0    |
| TCGA-02-0085 | Mesenchymal | 4.834 | UC     | -2.036 | Female | NA  | No  | Methylated   | 92.5 | 0    |
| TCGA-02-0086 | Mesenchymal | 5.292 | 1.245  | -2.94  | Female | 100 | No  | Unmethylated | 100  | 20   |
| TCGA-02-0099 | Mesenchymal | 3.807 | UC     | -2.894 | Male   | 80  | Rec | Methylated   | 97.5 | 7.5  |
| TCGA-02-0106 | Mesenchymal | 3.714 | UC     | -3.156 | Male   | NA  | No  | Unmethylated | 100  | 7.5  |
| TCGA-02-0107 | Mesenchymal | 5.111 | UC     | -2.845 | Male   | 90  | Rec | Unmethylated | 92.5 | 10   |
| TCGA-02-0111 | Mesenchymal | 4.24  | UC     | -3.31  | Male   | NA  | No  | Methylated   | 90   | 17.5 |
| TCGA-02-0326 | Mesenchymal | 4.429 | UC     | -1.591 | Female | NA  | No  | Unmethylated | 85   | 10   |
| TCGA-02-0330 | Mesenchymal | 4.429 | -1.033 | -1.886 | Female | NA  | No  | Unmethylated | 97   | 2.5  |
| TCGA-02-0332 | Mesenchymal | 4.526 | -1.924 | -3.245 | Female | NA  | No  | Methylated   | 100  | 27.5 |
| TCGA-02-0337 | Mesenchymal | 4.429 | -1.691 | -2.814 | Male   | NA  | No  | Unmethylated | 95   | 20   |

|              |             |       |        |        |        |     |     |              |      |      |
|--------------|-------------|-------|--------|--------|--------|-----|-----|--------------|------|------|
| TCGA-06-0122 | Mesenchymal | 4.821 | UC     | -2.13  | Female | 70  | No  | Unmethlyated | 100  | 20   |
| TCGA-06-0124 | Mesenchymal | 4.572 | UC     | -2.256 | Male   | 70  | No  | Methylated   | 100  | 10   |
| TCGA-06-0130 | Mesenchymal | 4.662 | UC     | -2.832 | Male   | 90  | No  | Unmethlyated | 80   | 5    |
| TCGA-06-0139 | Mesenchymal | 4.436 | UC     | -2.787 | Male   | 60  | No  | Unmethlyated | 95   | 0    |
| TCGA-06-0143 | Mesenchymal | 3.506 | UC     | -2.641 | Male   | 70  | No  | Unmethlyated | 82.5 | 37.5 |
| TCGA-06-0147 | Mesenchymal | 4.828 | UC     | -2.421 | Female | NA  | No  | Unmethlyated | 100  | 22.5 |
| TCGA-06-0149 | Mesenchymal | 3.517 | -2.091 | -3.323 | Female | 90  | No  | Methylated   | 100  | 17.5 |
| TCGA-06-0152 | Mesenchymal | 3.838 | UC     | -2.771 | Male   | NA  | No  | Unmethlyated | 97   | 36.5 |
| TCGA-06-0164 | Mesenchymal | 4.528 | UC     | -2.714 | Male   | 100 | No  | NA           | 100  | 15   |
| TCGA-06-0175 | Mesenchymal | 4.358 | -1.102 | -1.729 | Male   | 100 | No  | Unmethlyated | 90   | 0    |
| TCGA-06-0176 | Mesenchymal | 5.069 | UC     | -3.359 | Male   | 90  | No  | Unmethlyated | 92.5 | 35   |
| TCGA-06-0184 | Mesenchymal | 4.524 | UC     | -2.545 | Male   | 90  | No  | Unmethlyated | 95   | 5    |
| TCGA-06-0189 | Mesenchymal | 1.365 | -1.809 | -3.217 | Male   | NA  | No  | Unmethlyated | 100  | 32.5 |
| TCGA-06-0190 | Mesenchymal | 3.701 | UC     | -3.172 | Male   | 80  | No  | Unmethlyated | 100  | 40   |
| TCGA-06-0194 | Mesenchymal | 4.429 | UC     | -2.781 | Female | NA  | No  | Unmethlyated | 96.5 | 1    |
| TCGA-06-0197 | Mesenchymal | 5.068 | UC     | -3.142 | Female | NA  | No  | Unmethlyated | 90   | 2.5  |
| TCGA-06-0210 | Mesenchymal | 3.739 | UC     | -3.031 | Female | NA  | No  | Unmethlyated | 92.5 | 10   |
| TCGA-06-0397 | Mesenchymal | 4.543 | 1.496  | -2.53  | Female | NA  | No  | Methylated   | 85   | 25   |
| TCGA-06-0409 | Mesenchymal | 4.497 | -1.366 | -3.226 | Male   | NA  | No  | Methylated   | 82.5 | 27.5 |
| TCGA-06-0412 | Mesenchymal | 4.421 | UC     | -3.058 | Female | NA  | No  | Unmethlyated | 85   | 17.5 |
| TCGA-06-0644 | Mesenchymal | 5.409 | 1.221  | -2.957 | Male   | 80  | No  | Unmethlyated | 95   | 20   |
| TCGA-06-0645 | Mesenchymal | 5.151 | UC     | -2.664 | Female | NA  | No  | Methylated   | 97.5 | 15   |
| TCGA-08-0346 | Mesenchymal | 4.737 | UC     | -2.548 | Male   | 80  | No  | Unmethlyated | 92.5 | 12.5 |
| TCGA-08-0352 | Mesenchymal | 5.185 | UC     | -1.936 | Male   | NA  | No  | Unmethlyated | 80   | 15   |
| TCGA-08-0360 | Mesenchymal | 5.046 | UC     | -2.715 | Male   | NA  | No  | Unmethlyated | 82.5 | 20   |
| TCGA-08-0390 | Mesenchymal | 5.046 | UC     | -1.684 | Male   | 80  | No  | NA           | 95   | 2.5  |
| TCGA-08-0392 | Mesenchymal | 5.046 | 2.347  | -3.324 | Male   | NA  | No  | Unmethlyated | 100  | 15   |
| TCGA-08-0509 | Mesenchymal | 4.286 | UC     | -2.564 | Male   | NA  | No  | Unmethlyated | 97.5 | 7.5  |
| TCGA-08-0510 | Mesenchymal | 4.262 | UC     | -3.189 | Male   | 80  | No  | Unmethlyated | 100  | 10   |
| TCGA-08-0512 | Mesenchymal | 4.543 | UC     | -3.152 | Male   | 90  | No  | Unmethlyated | 100  | 37.5 |
| TCGA-08-0522 | Mesenchymal | 4.543 | 2.033  | -3.178 | Male   | NA  | No  | Unmethlyated | 87.5 | 37.5 |
| TCGA-12-0619 | Mesenchymal | 5.125 | -1.005 | -2.765 | Male   | 90  | No  | Methylated   | 100  | 7.5  |
| TCGA-12-0620 | Mesenchymal | 5.396 | UC     | -2.507 | Male   | 100 | No  | Unmethlyated | 100  | 7.5  |
| TCGA-02-0002 | Neural      | 4.619 | UC     | -2.425 | Male   | NA  | No  | Unmethlyated | 97.5 | 5    |
| TCGA-02-0052 | Neural      | 4.459 | -1.935 | -2.63  | Male   | 90  | No  | Unmethlyated | 100  | 12.5 |
| TCGA-02-0057 | Neural      | 3.744 | -1.407 | -2.797 | Female | 90  | Rec | Unmethlyated | 100  | 12.5 |
| TCGA-02-0083 | Neural      | 3.889 | UC     | -2.089 | Female | 90  | Rec | Methylated   | 100  | 20   |
| TCGA-02-0089 | Neural      | 4.603 | UC     | -2.024 | Male   | 100 | Rec | Unmethlyated | 100  | 10   |
| TCGA-02-0113 | Neural      | 1.844 | -2.133 | -3.167 | Female | NA  | Rec | Unmethlyated | 97.5 | 7.5  |
| TCGA-02-0115 | Neural      | 4.366 | UC     | -1.575 | Male   | NA  | No  | Methylated   | 100  | 0    |
| TCGA-02-0451 | Neural      | 2.849 | UC     | -1.892 | Female | NA  | No  | Unmethlyated | 92.5 | 5    |

|              |           |       |        |        |        |     |     |              |      |      |
|--------------|-----------|-------|--------|--------|--------|-----|-----|--------------|------|------|
| TCGA-06-0132 | Neural    | 3.399 | -1.316 | -2.028 | Male   | NA  | No  | Unmethlyated | 97.5 | 2.5  |
| TCGA-06-0133 | Neural    | UC    | -2.084 | -2.54  | Male   | NA  | No  | Unmethlyated | 100  | 0    |
| TCGA-06-0162 | Neural    | 3.04  | -1.175 | -1.21  | Female | 60  | No  | Unmethlyated | 90   | 0    |
| TCGA-06-0171 | Neural    | 4.04  | -1.354 | -1.868 | Male   | 100 | No  | Unmethlyated | 92.5 | 5    |
| TCGA-06-0173 | Neural    | 4.086 | -1.242 | -2.513 | Female | NA  | No  | Methylated   | 95   | 17.5 |
| TCGA-06-0179 | Neural    | 3.69  | UC     | UC     | Male   | 70  | No  | Methylated   | 90   | 5    |
| TCGA-06-0182 | Neural    | 3.284 | -1.107 | -2.734 | Male   | 60  | No  | Unmethlyated | 100  | 10   |
| TCGA-06-0185 | Neural    | 4.27  | -1.732 | -2.364 | Male   | 100 | No  | Methylated   | 100  | 5    |
| TCGA-06-0188 | Neural    | 1.259 | -1.688 | -1.997 | Male   | 100 | No  | Unmethlyated | 95   | 10   |
| TCGA-06-0195 | Neural    | 1.257 | -1.151 | UC     | Male   | 100 | No  | Methylated   | 90   | 0    |
| TCGA-06-0214 | Neural    | 3.92  | UC     | -2.835 | Male   | 40  | No  | Methylated   | 92.5 | 7.5  |
| TCGA-06-0219 | Neural    | 1.221 | -1.544 | -1.768 | Male   | 40  | No  | Unmethlyated | 100  | 12.5 |
| TCGA-06-0221 | Neural    | 3.992 | -1.774 | -1.421 | Male   | 40  | No  | Methylated   | 90   | 5    |
| TCGA-06-0237 | Neural    | 1.204 | -2.353 | -2.933 | Female | 40  | No  | Unmethlyated | 100  | 5    |
| TCGA-08-0349 | Neural    | 3.637 | UC     | -1.89  | Male   | 90  | No  | Unmethlyated | 85   | 12.5 |
| TCGA-08-0380 | Neural    | 3.856 | UC     | -2.596 | Female | 80  | No  | Unmethlyated | 100  | 2.5  |
| TCGA-08-0386 | Neural    | 2.817 | UC     | -2.148 | Male   | 90  | No  | Methylated   | 97.5 | 7.5  |
| TCGA-08-0389 | Neural    | UC    | -1.201 | -2.173 | Male   | NA  | No  | Unmethlyated | 95   | 0    |
| TCGA-08-0520 | Neural    | 2.808 | -2.378 | -2.458 | Male   | NA  | No  | Unmethlyated | 90   | 17.5 |
| TCGA-02-0003 | Proneural | 2.216 | UC     | -1.696 | Male   | 100 | No  | Unmethlyated | 100  | 12.5 |
| TCGA-02-0007 | Proneural | 3.804 | -2.615 | -2.615 | Female | 90  | Rec | Unmethlyated | 100  | 7.5  |
| TCGA-02-0010 | Proneural | 4.013 | -2.365 | -2.359 | Female | 80  | Sec | Unmethlyated | 100  | 5    |
| TCGA-02-0011 | Proneural | 2.962 | -2.492 | -1.328 | Female | 90  | No  | Unmethlyated | 100  | 2.5  |
| TCGA-02-0014 | Proneural | 1.486 | -1.795 | -1.277 | Male   | 100 | No  | Unmethlyated | 100  | 2.5  |
| TCGA-02-0024 | Proneural | 4.625 | UC     | -1.48  | Male   | 100 | Rec | Unmethlyated | 87.5 | 7.5  |
| TCGA-02-0026 | Proneural | 3.321 | -2.131 | -2.448 | Male   | NA  | No  | Unmethlyated | 100  | 22.5 |
| TCGA-02-0028 | Proneural | 3.469 | -2.157 | -3.196 | Male   | 100 | Sec | Methylated   | 100  | 20   |
| TCGA-02-0047 | Proneural | 3.858 | -1.795 | -2.751 | Male   | 90  | No  | Unmethlyated | 92.5 | 5    |
| TCGA-02-0048 | Proneural | 1.615 | -1.66  | -2.739 | Male   | NA  | No  | Unmethlyated | 100  | 5    |
| TCGA-02-0058 | Proneural | 1.832 | -1.776 | -1.372 | Female | 90  | Rec | Methylated   | 97.5 | 0    |
| TCGA-02-0060 | Proneural | 2.628 | -1.191 | -1.007 | Female | 80  | No  | Unmethlyated | 92.5 | 17.5 |
| TCGA-02-0069 | Proneural | 2.906 | -2.319 | -2.286 | Female | NA  | No  | Methylated   | 97.5 | 0    |
| TCGA-02-0074 | Proneural | 4.19  | -1.3   | -2.727 | Female | 90  | No  | Unmethlyated | 100  | 12.5 |
| TCGA-02-0080 | Proneural | 2.074 | -2.231 | UC     | Male   | 90  | Rec | Unmethlyated | 100  | 13.5 |
| TCGA-02-0084 | Proneural | 4.642 | -1.315 | -1.393 | Female | NA  | No  | Unmethlyated | 100  | 2.5  |
| TCGA-02-0087 | Proneural | 4.229 | -2.08  | -1.234 | Female | NA  | No  | Unmethlyated | 100  | 0    |
| TCGA-02-0104 | Proneural | UC    | -2.363 | -2.744 | Female | NA  | No  | Unmethlyated | 100  | 5    |
| TCGA-02-0114 | Proneural | 3.094 | -2.719 | -2.747 | Female | 90  | Sec | Methylated   | 100  | 12.5 |
| TCGA-02-0281 | Proneural | 4.173 | -1.183 | -2.283 | Female | NA  | No  | Methylated   | 100  | 5    |
| TCGA-02-0321 | Proneural | 4.536 | -1.739 | -2.373 | Male   | NA  | No  | Methylated   | 100  | 27.5 |
| TCGA-02-0325 | Proneural | 4.483 | UC     | -2.441 | Male   | NA  | No  | Unmethlyated | 100  | 20   |

|              |           |       |        |        |        |     |     |              |      |      |
|--------------|-----------|-------|--------|--------|--------|-----|-----|--------------|------|------|
| TCGA-02-0338 | Proneural | 3.265 | -1.818 | -2.657 | Male   | NA  | No  | Unmethylated | 100  | 5    |
| TCGA-02-0339 | Proneural | 2.452 | -2.325 | -1.635 | Male   | NA  | No  | Unmethylated | 100  | 0    |
| TCGA-02-0432 | Proneural | 1.263 | -2.862 | -1.379 | Male   | NA  | No  | Unmethylated | 92.5 | 5    |
| TCGA-02-0439 | Proneural | 3.432 | -2.217 | -2.45  | Female | NA  | No  | Unmethylated | 90   | 40   |
| TCGA-02-0440 | Proneural | 3.996 | -1.994 | -2.1   | Male   | NA  | No  | Unmethylated | 97.5 | 7.5  |
| TCGA-02-0446 | Proneural | 4.456 | -1.231 | -1.498 | Male   | NA  | No  | Unmethylated | 85   | 10   |
| TCGA-06-0128 | Proneural | 3.375 | -2.295 | -1.846 | Male   | 90  | No  | Unmethylated | 97.5 | 7.5  |
| TCGA-06-0129 | Proneural | 1.946 | -2.933 | -1.439 | Male   | 100 | No  | Unmethylated | 97.5 | 0    |
| TCGA-06-0146 | Proneural | 1.867 | -2.448 | -1.078 | Female | NA  | No  | Methylated   | 97.5 | 10   |
| TCGA-06-0166 | Proneural | 4.254 | UC     | -2.346 | Male   | NA  | No  | Unmethylated | 92.5 | 30   |
| TCGA-06-0174 | Proneural | 3.379 | -1.431 | -2.172 | Male   | 80  | No  | Methylated   | 97.5 | 10   |
| TCGA-06-0177 | Proneural | 3.953 | -1.934 | -1.975 | Male   | 70  | No  | Unmethylated | 92.5 | 2.5  |
| TCGA-06-0238 | Proneural | 3.016 | -1.084 | -2.541 | Male   | NA  | No  | Unmethylated | 100  | 5    |
| TCGA-06-0241 | Proneural | 2.604 | -1.929 | -2.478 | Female | 40  | No  | Methylated   | 100  | 7.5  |
| TCGA-06-0410 | Proneural | 4.387 | -1.665 | -1.958 | Female | NA  | No  | Unmethylated | 90   | 10   |
| TCGA-06-0413 | Proneural | 3.757 | -1.556 | -1.414 | Female | NA  | No  | Methylated   | 85   | 12.5 |
| TCGA-06-0414 | Proneural | 4.404 | -1.929 | -1.38  | Male   | 100 | No  | Methylated   | 87.5 | 7.5  |
| TCGA-06-0646 | Proneural | 3.6   | UC     | -2.47  | Male   | 90  | No  | Unmethylated | 95   | 7.5  |
| TCGA-06-0648 | Proneural | 3.27  | -1.154 | -1.436 | Male   | 90  | No  | Methylated   | 100  | 10   |
| TCGA-08-0245 | Proneural | 3.473 | -1.942 | -1.866 | Female | NA  | No  | NA           | 95   | 2    |
| TCGA-08-0344 | Proneural | 1.48  | -1.11  | -1.4   | Male   | 100 | No  | Unmethylated | 87.5 | 0    |
| TCGA-08-0345 | Proneural | 5.157 | UC     | -1.776 | Female | 70  | No  | Unmethylated | 85   | 0    |
| TCGA-08-0347 | Proneural | 4.787 | UC     | -1.747 | Male   | 90  | No  | Methylated   | 80   | 0    |
| TCGA-08-0348 | Proneural | 4.668 | -1.577 | -2.455 | Male   | 90  | No  | Unmethylated | 92.5 | 15   |
| TCGA-08-0350 | Proneural | 4.597 | -1.807 | -1.628 | Male   | 90  | No  | Methylated   | 92.5 | 10   |
| TCGA-08-0351 | Proneural | 3.862 | -1.226 | -1.429 | Male   | 100 | No  | NA           | 82.5 | 2.5  |
| TCGA-08-0353 | Proneural | 2.812 | -1.16  | -2.644 | Male   | NA  | No  | NA           | 85   | 32.5 |
| TCGA-08-0359 | Proneural | 3.346 | -1.455 | -1.744 | Female | NA  | No  | Methylated   | 87.5 | 5    |
| TCGA-08-0385 | Proneural | 3.982 | -1.692 | -2.779 | Male   | NA  | No  | NA           | 100  | 7.5  |
| TCGA-08-0517 | Proneural | 3.888 | -2.405 | -2.224 | Female | 70  | Rec | Methylated   | 100  | 0    |
| TCGA-08-0524 | Proneural | 3.34  | -2.782 | -2.129 | Female | NA  | No  | Unmethylated | 90   | 10   |
| TCGA-12-0616 | Proneural | 4.368 | -1.533 | -3.122 | Female | 100 | No  | Unmethylated | 100  | 27.5 |
| TCGA-12-0618 | Proneural | 2.111 | UC     | -1.577 | Male   | 70  | No  | Unmethylated | 100  | 6.5  |

MiRNA expression values, here presented in a logarithmic scale ( $\log_2$  tumor/normal ratio), were further converted into a normal tumor/normal ratio. The Karnofsky Performance Scale (Karn score) classifies patients according to their functional impairment and can be used to compare effectiveness of different therapies and to assess the prognosis in individual patients. The lower the Karnofsky score, the worse the survival for most serious illnesses. The O6-methylguanine-methyltransferase (MGMT) promoter methylation status is a predictive parameter for the response of malignant gliomas to alkylating agents, such as temozolomide (TMZ). Promoter hypermethylation was associated with prolonged survival (46%,

2-year survival) in GBM patients treated with concomitant TMZ and radiation as compared to patients without evidence of tumor hypermethylation (Hegi et al., 2005). NA - non-attributed; UC - unchanged, when compared to control normal samples.
