# Supplementary material
Source: PubMed Central journal article supplement (PMC3561912)
Supplement: supp_dds496_dds496supp_table3.pdf [file supp_dds496_dds496supp_table3.pdf]

**Supplementary Table S3.** Oligonucleotide sequences.

| <b>Oligonucleotide sequences for miRNA modulation</b>             |                                     |                                                  |
|-------------------------------------------------------------------|-------------------------------------|--------------------------------------------------|
| LNA-modified anti-miR-21                                          |                                     | 5'-CAACATCAGTCTGATAAGCT-3'                       |
| scrambled sequence                                                |                                     | 5'-ACGTCTATACGCCCA-3'                            |
| <b>Detection probes for FISH (digoxigenin-labelled at the 5')</b> |                                     |                                                  |
| anti-miR-21                                                       |                                     | 5'-TCAACATCAGTCTGATAAGCTA-3'                     |
| scrambled sequence                                                |                                     | 5'-GTGTAACACGTCTATACGCCCA-3'                     |
| U6snRNA                                                           |                                     | 5'-CACGAATTTGCGTGTTCATCCTT-3'                    |
| <b>Primers used for qPCR</b>                                      |                                     | <b>Target sequence</b>                           |
| miR-21                                                            | Applied Biosystems<br>(PN: 4427975) | UAGCUUAUCAGACUGAUGUUGA<br>Assay ID: 000397       |
| miR-221                                                           |                                     | AGCUACAUGUCUGCUGGGUUC<br>Assay ID: 000524        |
| miR-128                                                           |                                     | UCACAGUGAACCGGUCUCUUU<br>Assay ID: 002216        |
| U6snRNA                                                           |                                     | Assay ID: 001973                                 |
|                                                                   |                                     | <b>Target sequence</b>                           |
| miR-21                                                            | Exiqon                              | UAGCUUAUCAGACUGAUGUUGA<br>Catalog Number: 204230 |
| miR-128                                                           |                                     | UCACAGUGAACCGGUCUCUUU<br>Catalog Number: 204626  |
| miR-221                                                           |                                     | AGCUACAUGUCUGCUGGGUUC<br>Catalog Number: 204532  |
| miR-19b                                                           |                                     | UGUGCAAUCCAUGCAAACUGA<br>Catalog Number: 204450  |
| miR-27a                                                           |                                     | UUCACAGUGGCUAAGUCCGC<br>Catalog Number: 204764   |
| U6snRNA                                                           |                                     | Product Number: 203907                           |
| PTEN                                                              | Qiagen                              | Product number: Human - QT00086933               |
| PDCD4                                                             |                                     | Product number: Human - QT00030548               |
|                                                                   |                                     |                                                  |

|       |  |                                    |
|-------|--|------------------------------------|
|       |  |                                    |
| HPRT1 |  | Product number: Human - QT00059066 |
